# Supplementary material for: Solution-processed copper oxide interlayers for broadband PbS quantum-dot photodiodes
Source: Royal Society of Chemistry journal article supplement (doi:10.1039/c6tc03531k), 2016-01-01
Supplement: c6tc03531k1.pdf [file c6tc03531k1.pdf]

## Supplemental Information

### Solution-Processed Copper Oxide Interlayer for Broadband PbS Quantum-Dot Photodiode

*Hyeonggeun Yu, Shyui Liu, Sujin Baek, Do Young Kim<sup>1</sup>, Chen Dong, and Franky So\**

Dr. H. Yu, Dr. S. Liu, S. Baek, C. Dong, and Prof. So\*

Department of Materials Science and Engineering,

North Carolina State University, Raleigh, NC27695, USA

E-mail: fso@ncsu.edu

Prof. Kim<sup>1</sup>,

School of Materials Science and Engineering,

Oklahoma State University, Tulsa, OK 74106, USA

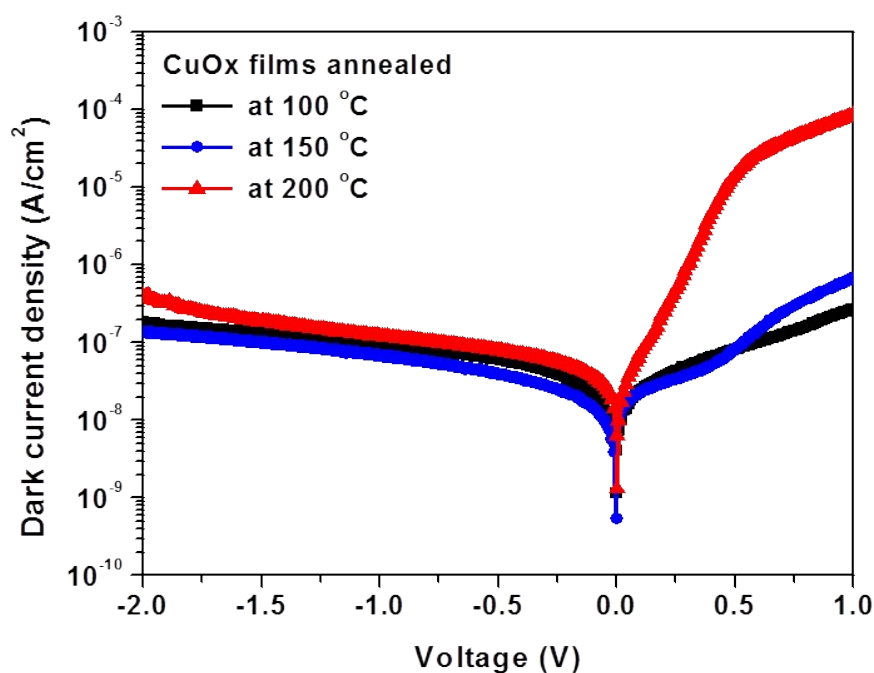

**Figure S1.** Dark current behaviors of the photodetector with CuOx HTL annealed at different temperatures.

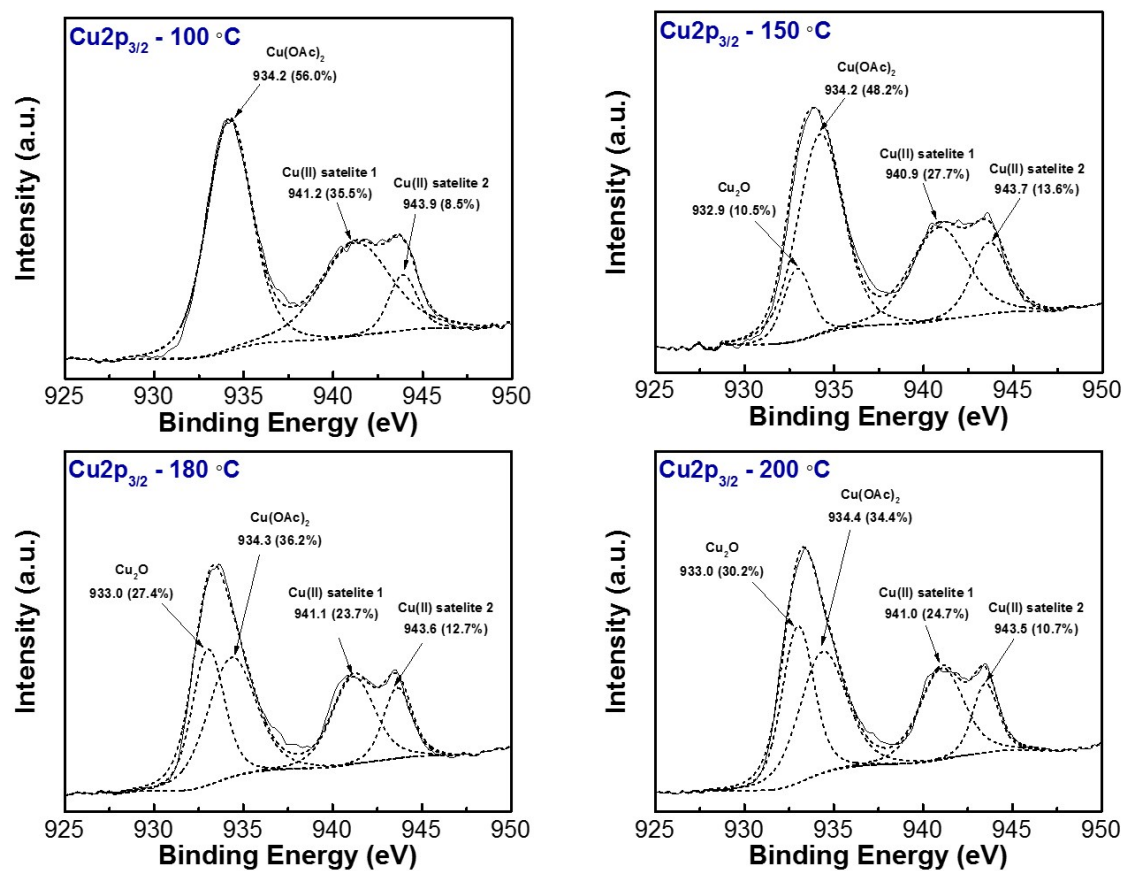

**Figure S2.** Cu<sub>2</sub>p<sub>3/2</sub> x-ray photoemission spectra of CuO<sub>x</sub> HTL annealed at different temperatures.

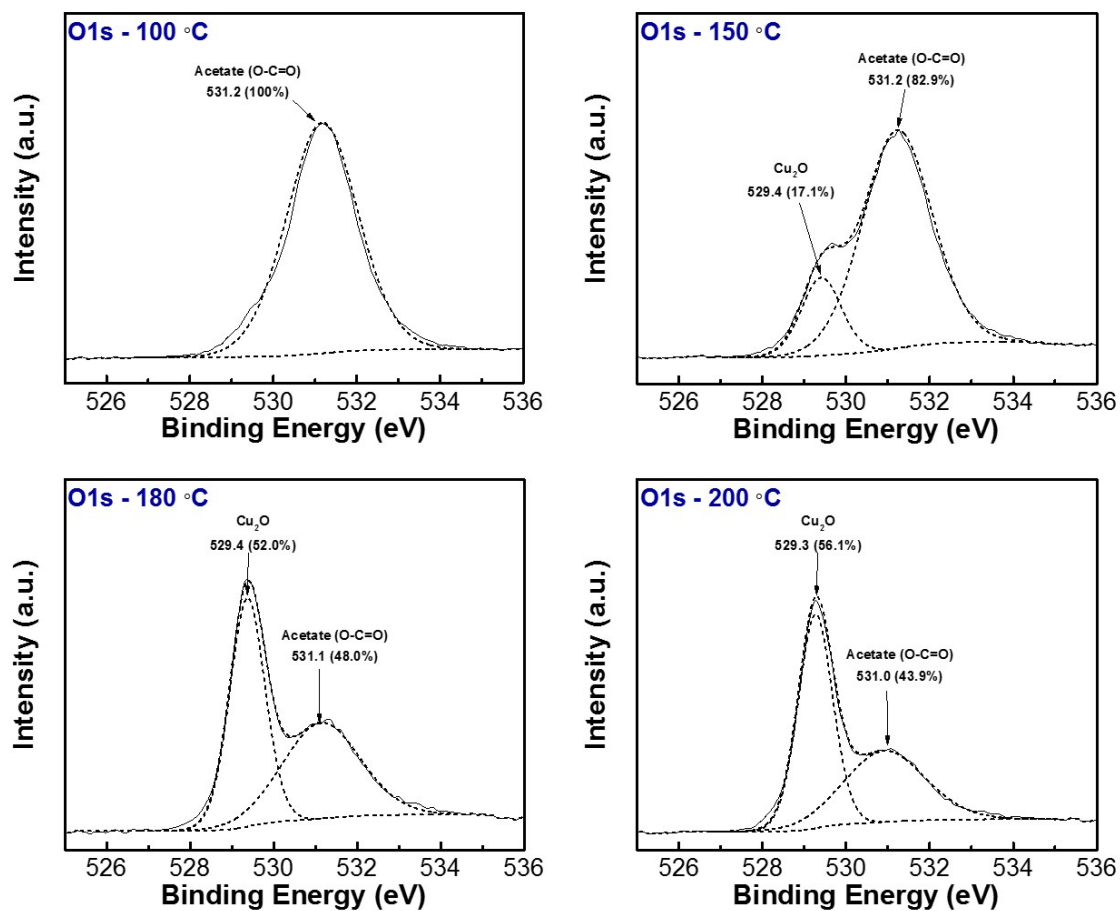

**Figure S3.** O1s x-ray photoemission spectra of CuOx HTL annealed at different temperatures.

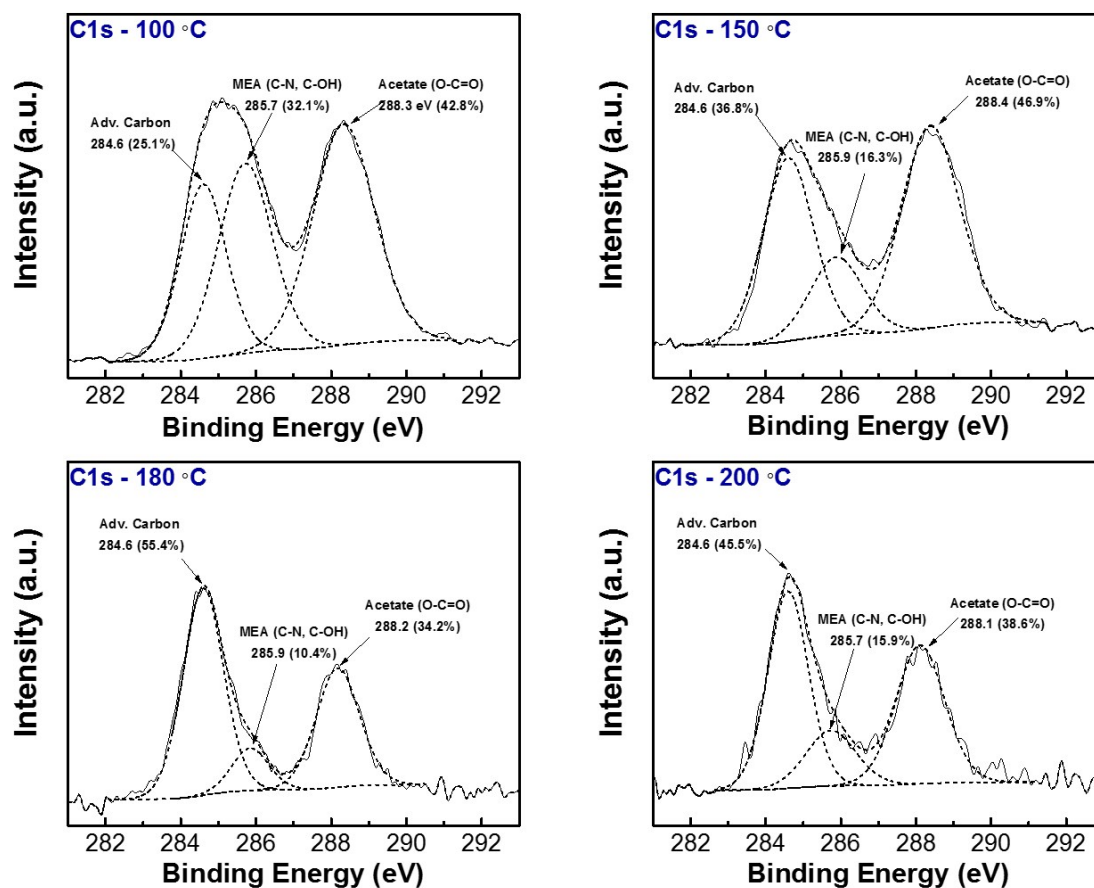

**Figure S4.** C1s x-ray photoemission spectra of CuOx HTL annealed at different temperatures.

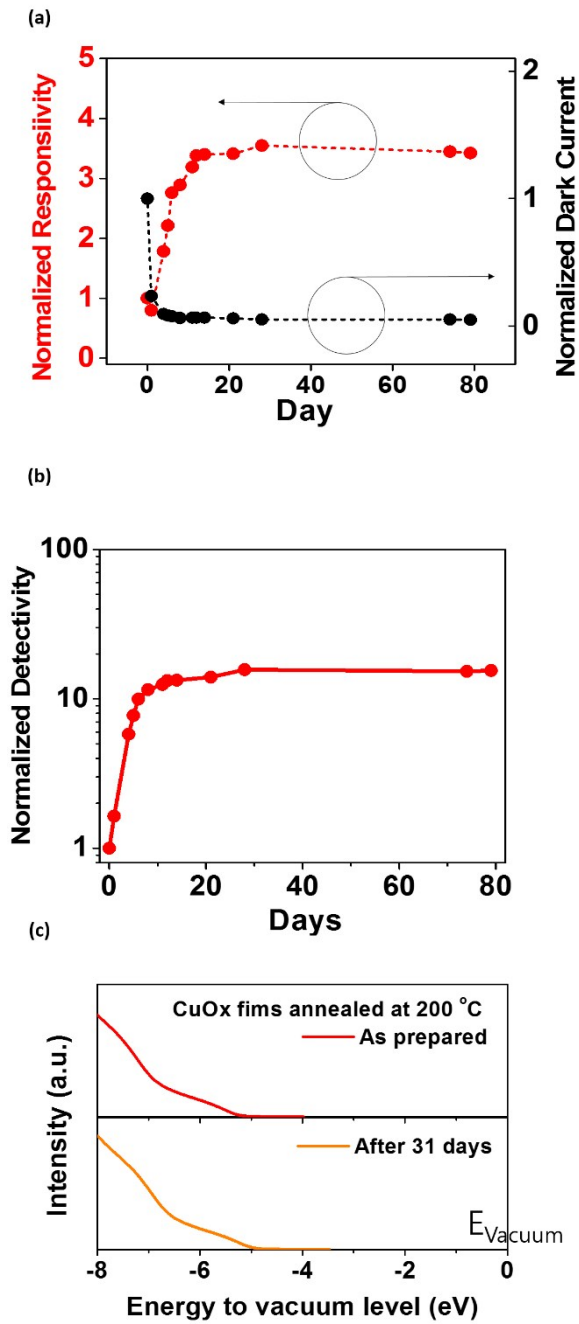

**Figure S5.** Air stability of the PbS photodetector annealed at 200°C degree. a) Normalized Response and normalized dark current trend up to 80 days, b) Normalized detectivity. c) UPS measurement of CuOx films annealed at 200°C degree before and after 31 days.

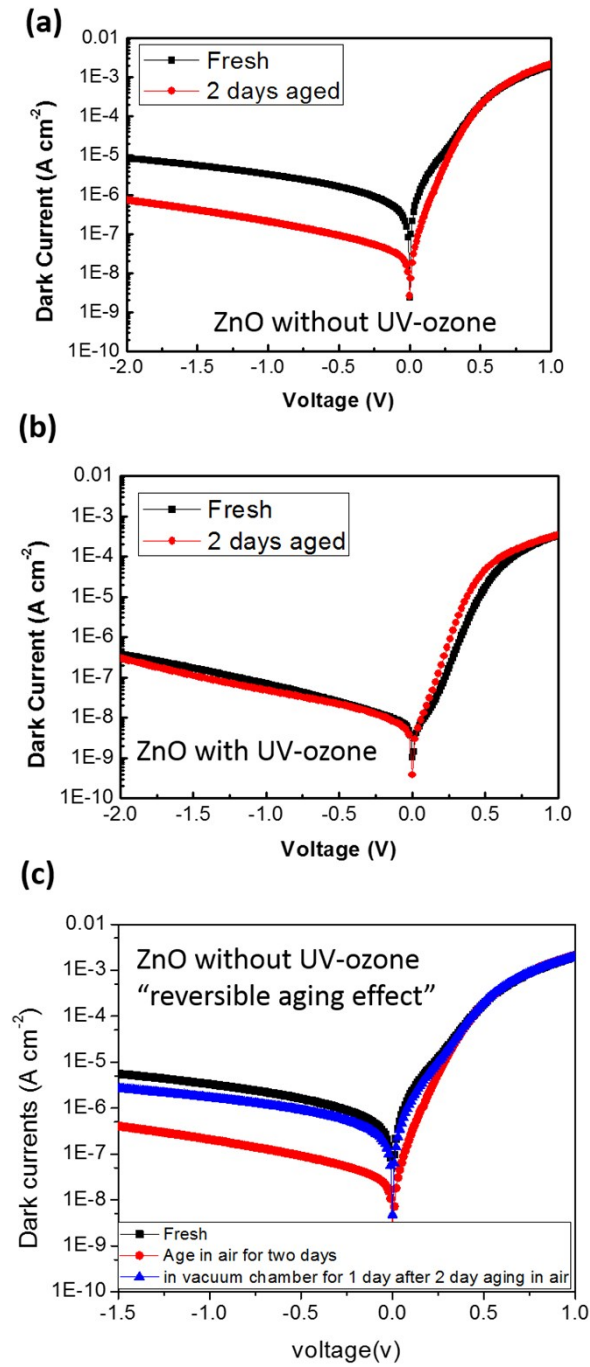

**Figure S6.** Dark current behavior of the photodiode a) without and b) with UV-ozone treatment on ZnO interlayer. c) Reversible dark current after de-oxidizing the sample in a high vacuum

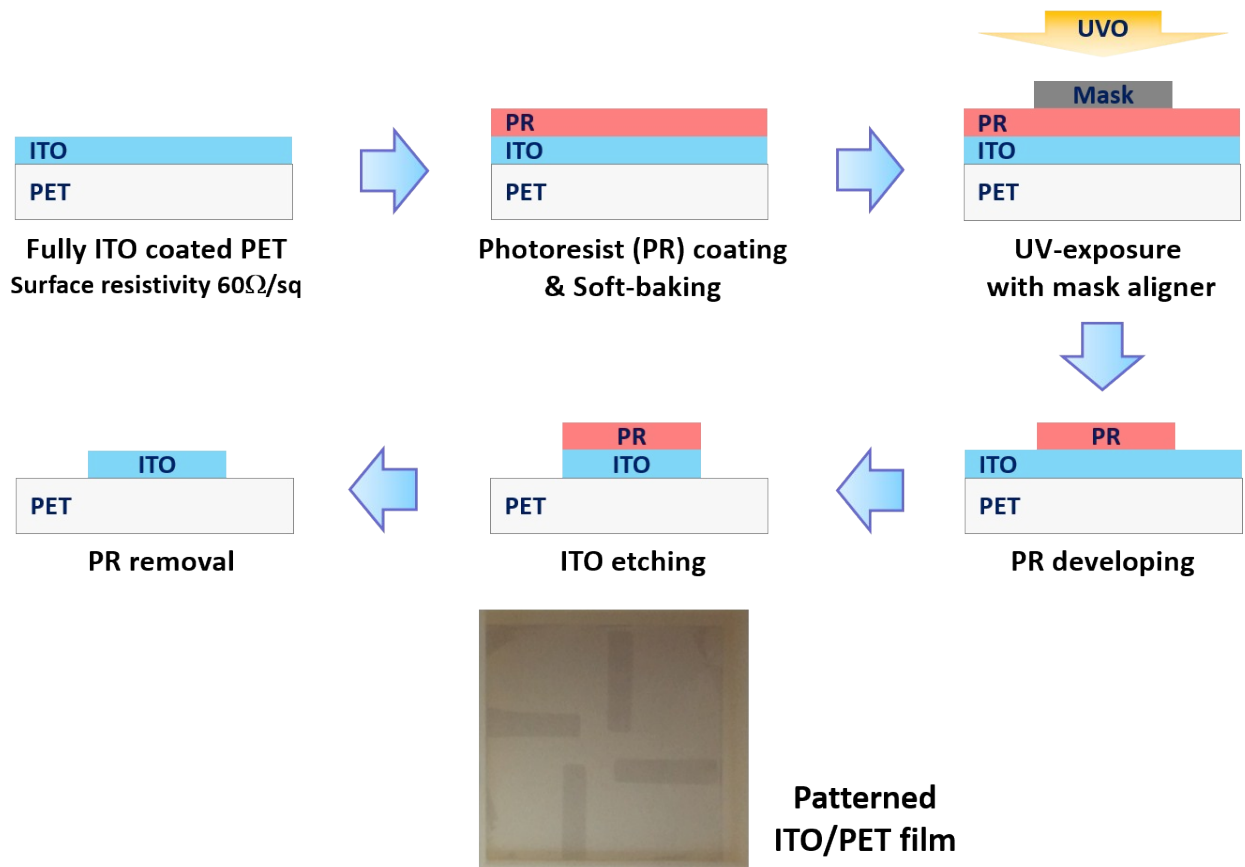

**Figure S7.** Fabrication of patterned ITO film on PET substrate by photolithography for flexible PbS photodetector.

## ■ Detectivity Measurement

In our detectivity measurement, only shot noise was considered because 1/f noise can be ignored at the low device operation voltage of -1 V<sup>1</sup>. Shot noise is defined as<sup>2</sup>,

$$I_s = \sqrt{2qB(I_p + I_b + I_d)}$$

where B is bandwidth,  $I_p$  is photo current,  $I_b$  is noise current from background radiation and  $I_d$  is dark current.

Thermal noise is defined as,

$$I_t = \sqrt{\frac{4kTB}{R_{shunt}}}$$

where T is the temperature, k is Boltzman constant, and  $R_{shunt}$  is shunt resistance in the device.

Since  $I_p$ ,  $I_b$ , and  $I_t$  are typically neglected at noise equivalent optical input power (NEP)<sup>1-3</sup>, the detector's noise is dominated by the dark current noise (shot noise). Then, NEP is defined as,

$$NEP = \frac{\sqrt{2qI_d B}}{R}$$

where R is responsivity (A/W) of the device. Then, specific detectivity ( $D^*$ ) is defined as,

$$D^* = \frac{\sqrt{AB}}{NEP}$$

where A is the device area. Therefore, detectivity can be calculated from responsivity and dark current density as below,

$$D^* = \sqrt{AB} \times \frac{R}{\sqrt{2qI_d B}} = \frac{R}{\sqrt{2qJ_d}}$$

## Reference



1. Manders, J. R.; Lai, T. H.; An, Y.; Xu, W.; Lee, J.; Kim, D. Y.; Bosman, G.; So, F. Low-Noise Multispectral Photodetectors Made from All Solution-Processed Inorganic Semiconductors. *Advanced Functional Materials* 2014, **24**, 7205-7210.
2. Sze, S. M.; Ng, K. K. *Physics of semiconductor devices*. John wiley & sons: 2006.
3. Guo, F. Low Noise, High Detectivity Photodetectors based on Organic Materials. 2014.
